# Supplementary material for: Dynamic early identification of hip replacement implants with high revision rates. Study based on the NJR data from UK during 2004-2012
Source: PLOS journal article supplement (doi:10.1371/journal.pone.0236701), 2020-08-04
Supplement: S7 (10.1371/journal.pone.0236701.s007) [file journal.pone.0236701.s007]

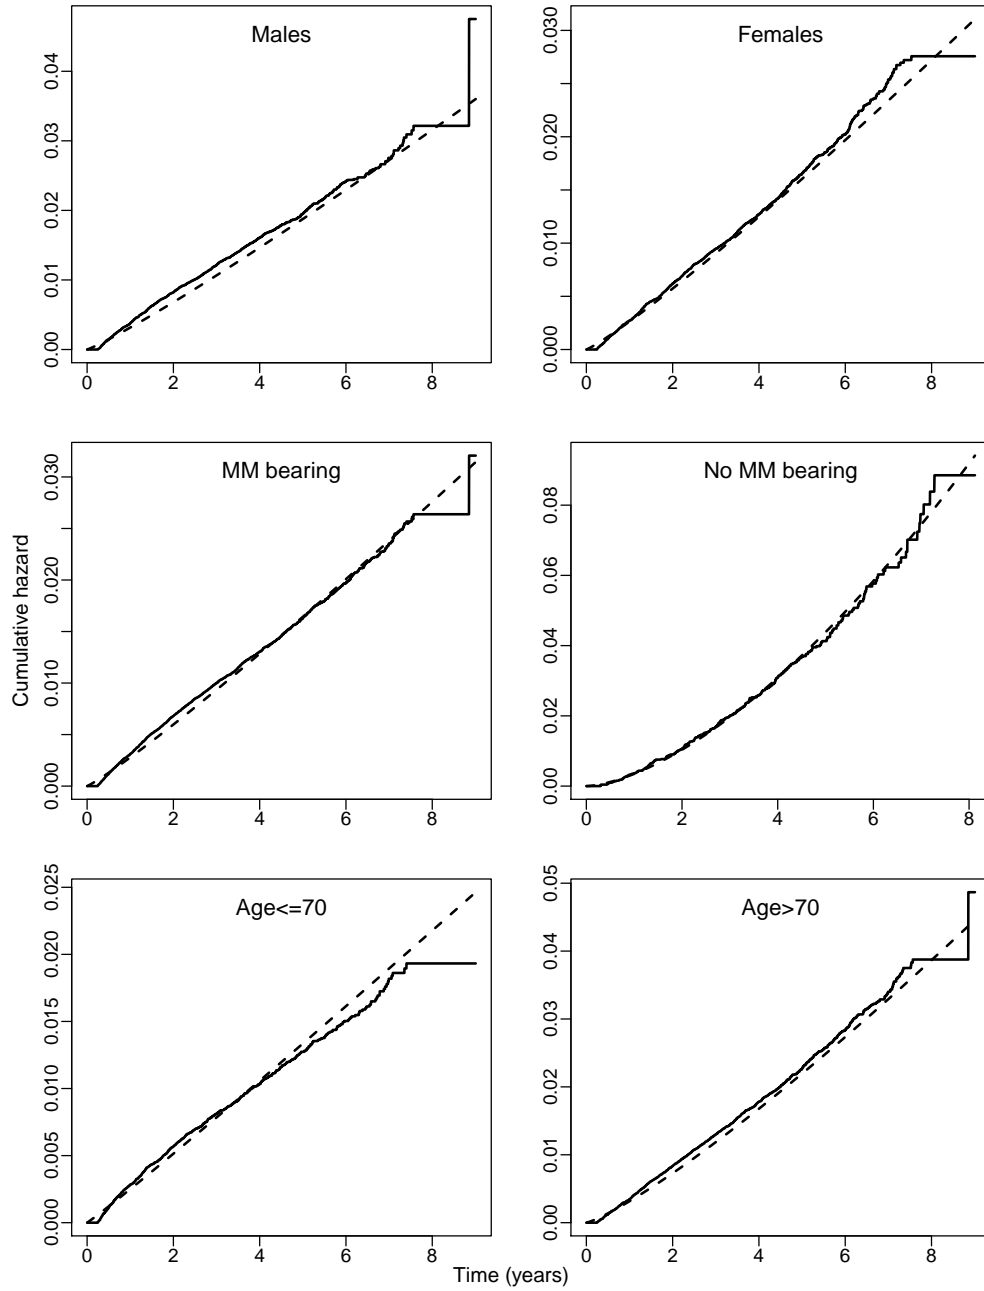

**S1 Fig. Empirical and fitted cumulative hazards of revision.** Averaged empirical (solid lines) and fitted (dashed lines) cumulative hazards of revision from the final survival model, at quarter 4, year 2012, with the Weibull baseline hazards.
